# Supplementary material for: Physical activity of children and adolescents with Charcot-Marie-Tooth neuropathies: A cross-sectional case-controlled study
Source: PubMed Central journal article supplement (PMC6561632; doi:10.1371/journal.pone.0209628), 2019-06-12
Supplement: pone.0209628.s001.pdf [file pone.0209628.s001.pdf]

**Supplementary material – Physical Activity Questionnaire – child (PAQ-C)**

adapted for Australian participants

**Instructions**

- We would like to know about your level of physical activity from the last 7 days (the last week).
- This includes sports or dance that make you sweat or make your legs feel tired, or games that make you breathe hard, like playing chasey, skipping, running, climbing and others.
- There are no right or wrong answers – this is not a test.
- Please answer all the questions as honestly and accurately as you can – this is important.
- If your parent or another adult helped you fill in this questionnaire please tick the box “I had help 😊”.
- If you have any concerns about these questions or how they make you feel, please let your parent and / or the physiotherapist who is doing your assessment know.

|           |       |              |
|-----------|-------|--------------|
| Study ID: | Date: | I had help 😊 |
|-----------|-------|--------------|

1. Physical activity in your spare time (time not in school or in organised sports / classes): Have you done any of the following activities in the past 7 days (last one week)? If yes, how many times? Tick one box per row.

|                                            | No | 1-2 | 3-4 | 5-6 | 7 times or more. |
|--------------------------------------------|----|-----|-----|-----|------------------|
| Skipping                                   |    |     |     |     |                  |
| Water sports                               |    |     |     |     |                  |
| Roller blading/skating                     |    |     |     |     |                  |
| Chasey / tag                               |    |     |     |     |                  |
| Walking for exercise                       |    |     |     |     |                  |
| Walking to/from school or public transport |    |     |     |     |                  |
| Bicycling for fun / recreation             |    |     |     |     |                  |
| Bicycling to/from school                   |    |     |     |     |                  |
| Jogging or running                         |    |     |     |     |                  |
| Aerobics / gym                             |    |     |     |     |                  |
| Swimming for fun/recreation                |    |     |     |     |                  |
| Cricket / baseball / softball              |    |     |     |     |                  |
| Dance                                      |    |     |     |     |                  |
| Football                                   |    |     |     |     |                  |
| Soccer                                     |    |     |     |     |                  |
| Skateboarding                              |    |     |     |     |                  |
| Hockey                                     |    |     |     |     |                  |

|                      |  |  |  |  |  |
|----------------------|--|--|--|--|--|
| Basketball / netball |  |  |  |  |  |
| Other                |  |  |  |  |  |

2. In the last 7 days, during your sports and / or physical education (PE) classes, how often were you very active (playing hard, running, jumping, throwing)? (Tick one only)

|               |  |
|---------------|--|
| I don't do PE |  |
| Hardly ever   |  |
| Sometimes     |  |
| Quite often   |  |
| Always        |  |

3. In the last 7 days, what did you do most of the time at recess / little play? (Tick one only)

|                                               |  |
|-----------------------------------------------|--|
| Sat down (talking, reading, doing schoolwork) |  |
| Stood around or walked around                 |  |
| Ran or played a little bit                    |  |
| Ran around and played quite a bit             |  |
| Ran and played hard most of the time          |  |

4. In the last 7 days, what did you normally do at lunch (besides eating lunch)? (Tick one only)

|                                               |  |
|-----------------------------------------------|--|
| Sat down (talking, reading, doing schoolwork) |  |
| Stood around or walked around                 |  |
| Ran or played a little bit                    |  |
| Ran around and played quite a bit             |  |
| Ran and played hard most of the time          |  |

5. In the last 7 days, on how many days right after school did you do sports, dance or play games in which you were very active? This can include Out of school hours care (OHSC) (Tick one only)

|                        |  |
|------------------------|--|
| None                   |  |
| 1 time last week       |  |
| 2 or 3 times last week |  |

|                   |  |
|-------------------|--|
| 4 times last week |  |
| 5 times last week |  |

6. In the last 7 days, on how many evenings did you do sports, dance or play games in which you were very active? (Tick one only)

|                        |  |
|------------------------|--|
| None                   |  |
| 1 time last week       |  |
| 2 or 3 times last week |  |
| 4-5 times last week    |  |
| 6-7 times last week    |  |

7. *On the last week-end*, how many times did you do sports, dance or play games in which you were very active? (Tick one only)

|                 |  |
|-----------------|--|
| None            |  |
| 1 time          |  |
| 2 or 3 times    |  |
| 4-5times        |  |
| 6 or more times |  |

8. Which *one* of the following describes you best for the last 7 days? Read *all five* statements before deciding on the *one* answer that describes you. (Tick one only)

- A. All or most of my free time was spend doing things that involve little physical effort
- B. I sometimes (1-2 times last week) did physical things in my free time (eg. Played sports, went running, swimming, bike riding etc)
- C. I often (3-4 times last week) did physical things in my free time
- D. I quite often (5-6 times last week) did physical things in my free time
- E. I very often (7 or more times last week) did physical things in my free time

9. Mark how often you did physical activity (like playing sports, games, dancing or any other physical activity) for each day last week. (Tick one box per row)

|           | None | A little bit | Medium | Often | Very often |
|-----------|------|--------------|--------|-------|------------|
| Monday    |      |              |        |       |            |
| Tuesday   |      |              |        |       |            |
| Wednesday |      |              |        |       |            |
| Thursday  |      |              |        |       |            |
| Friday    |      |              |        |       |            |
| Saturday  |      |              |        |       |            |

|        |  |  |  |  |  |
|--------|--|--|--|--|--|
| Sunday |  |  |  |  |  |
|--------|--|--|--|--|--|

10. Were you sick last week, or did anything prevent you from doing your normal physical activities? (Tick on only)

Yes    If yes, what prevented you? \_\_\_\_\_

No

Adapted from Kowalski KC, Crocker PRE, Donen RM. The Physical Activity Questionnaire for Older Children (PAQ-C) and Adolescents (PAQ-A) Manual. Saskatoon, Canada: University of Saskatchewan; 2004.
